# Supplementary material for: Different pattern of CSF glial markers between dementia with Lewy bodies and Alzheimer’s disease
Source: PubMed Central journal article supplement (PMC6534578; doi:10.1038/s41598-019-44173-8), 2019-05-24
Supplement: 41598_2019_44173_MOESM1_ESM.pdf [file 41598_2019_44173_MOESM1_ESM.pdf]

## **Supplementary Material**

**Title: Different pattern of CSF glial markers between dementia with Lewy bodies and Alzheimer's disease**

**Authors:** Estrella Morenas-Rodríguez, M.D.<sup>1,2,3</sup>, Daniel Alcolea M.D., Ph.D.<sup>1,2,3</sup>, Marc Suárez-Calvet M.D, Ph.D.<sup>4,5</sup>, Laia Muñoz-Llahuna BSc<sup>1,2,3</sup>, Eduard Vilaplana Ph.D.<sup>1,2,3</sup>, Isabel Sala Matavera Ph.D.<sup>1,2,3</sup>, Andrea Subirana MSc<sup>1,2,3</sup>, Marta Querol-Vilaseca MSc.<sup>1,2,3</sup>, María Carmona-Iragui M.D., Ph.D.<sup>1,2,3</sup>, Ignacio Illán-Gala M.D.<sup>1,2,3</sup>, Roser Ribosa-Nogué M.D.<sup>1,2,3</sup>, Rafael Blesa M.D., Ph.D.<sup>1,2,3</sup>, Christian Haass, PhD<sup>4,5,6</sup>, Juan Fortea M.D., Ph.D.<sup>1,2,3</sup>, Alberto Lleó, M.D., Ph.D.\*<sup>1,2,3</sup>.

### **Affiliations**

<sup>1</sup> Memory Unit, Neurology Department, Hospital de la Santa Creu i Sant Pau, Barcelona, <sup>2</sup> Institut d'Investigacions Biomediques Sant Pau – Universitat Autònoma de Barcelona, <sup>3</sup> Centro de Investigación Biomédica en Red en Enfermedades Neurodegenerativas, CIBERNED, Instituto de Salud Carlos III. <sup>4</sup> Chair of Metabolic Biochemistry, Biomedical Center (BMC), Faculty of Medicine, Ludwig-Maximilians-Universität München, Munich, Germany. <sup>5</sup> German Center for Neurodegenerative Diseases (DZNE) Munich, Munich, Germany. <sup>6</sup> Munich Cluster for Systems Neurology (SyNergy), Munich, Germany.

**Suppl. table S1.** Demographic and basic clinical data from DLB patients

|                              | DLB with AD<br>copathology<br>(n = 20) | DLB without AD<br>copathology<br>(n = 17) | p-value |
|------------------------------|----------------------------------------|-------------------------------------------|---------|
| Age, y ± SD                  | 77.1 ± 1.1                             | 75.7 ± 1.2                                | 0.420   |
| Sex, Females % (n)           | 55% (11)                               | 52.9% (9)                                 | 1       |
| MMSE, mean ± SD              | 21.9 ± 1.2                             | 24.2 ± 0.8                                | 0.165   |
| Mean follow-up time (y) ± SD | 2.2 ± 0.5                              | 2.6 ± 0.6                                 | 0.568   |
| APOEε4, %* (n)               | 30% (6)                                | 17.6% (3)                                 | 0.462   |

**Supplementary figure S1.** Relationship between glial biomarkers by diagnosis

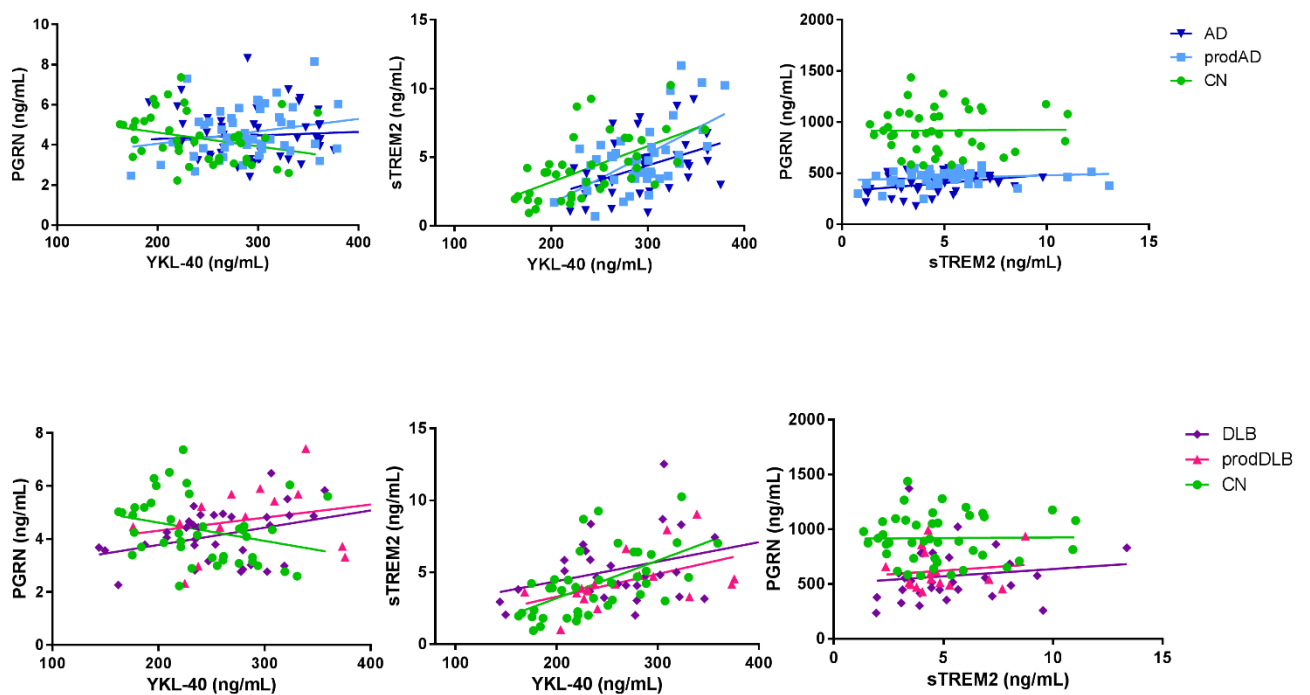

CN: cognitively normal controls, DLB: Dementia with Lewy Bodies, prodDLB: prodromal DLB, AD: Alzheimer's disease, prodAD: prodromal AD.

## Supplementary figure S2. Relationship between glial and core AD biomarkers

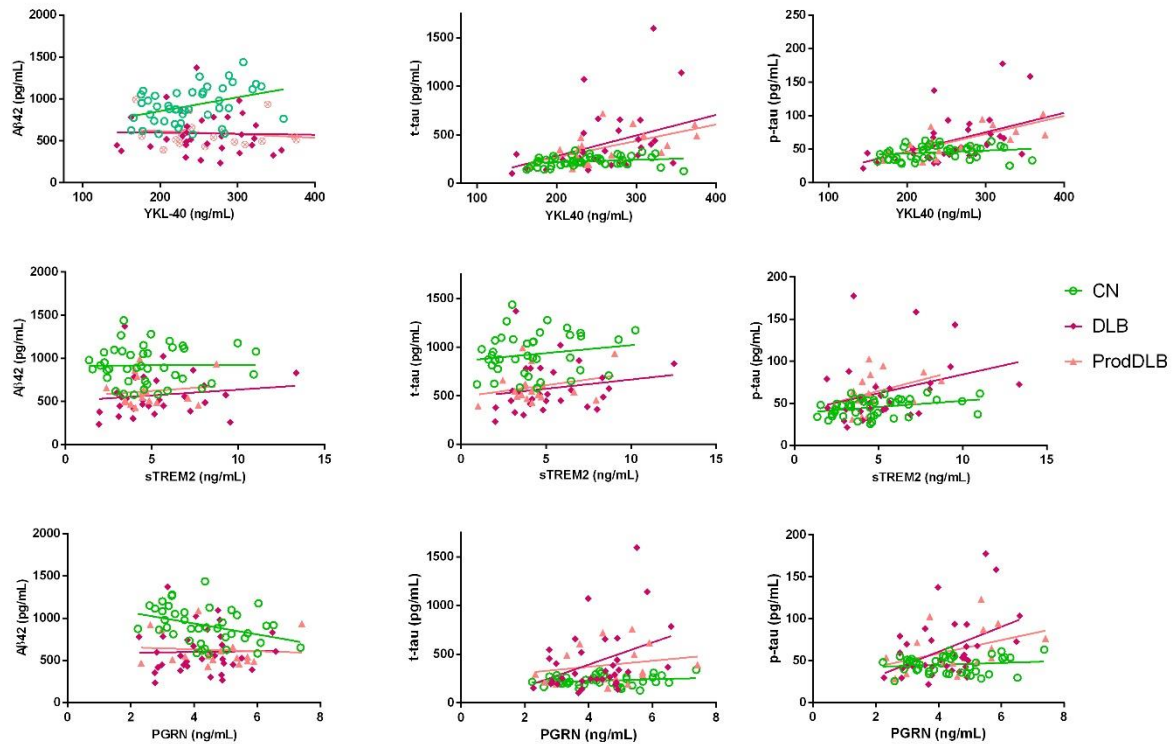

CN: cognitively normal controls, DLB: Dementia with Lewy Bodies, prodDLB: prodromal DLB,

## Supplementary methods

### Supplementary table S2. Intra and inter-assay CV% per measured protein.

| Assay         | intra-assay CV%* | inter-assay CV%** |
|---------------|------------------|-------------------|
| <b>Aβ1-42</b> | 2.01%            | 11.07%            |
| <b>t-tau</b>  | 2.01%            | 10.89%            |
| <b>p-tau</b>  | 1.77%            | 17.24%            |
| <b>sTREM2</b> | 3.9%             | 13.02%            |
| <b>YKL-40</b> | 4.03%            | 6.3%              |
| <b>PGRN</b>   | 4.47%            | 10.7%             |

\* Intra-assay CV% was calculated as the mean of all CV% from the samples included per assay

\*\* We included the following internal controls per assay to calculate the inter-assay CV%. Internal controls are samples with an already known concentration that we included in all the assays. In Braquets there is the mean from all assays and the interplate CV % of each internal control. Aβ1-42: L10-001 (mean: 392.5 pg/mL, CV%: 10.85%), Aβ384 (mean: 359 pg/mL, CV%: 12.48%), Aβ500 (mean: 472.73 pg/mL, CV%: 9.87%). t-tau: tau300 (mean: 297.78 pg/mL, CV%: 10.89%). p-tau: pTau125 (mean: 132.98 pg/mL, CV%: 17.24%). sTREM2: Interplate D (mean: 3.08 ng/mL, CV%: 11.54%) and Interplate

E (mean: 4.44 ng/mL, CV%: 14.51%). YKL-40: YKL40H (mean: 142.84 ng/mL, CV%: 6.3%). PGRN: L10-84 (mean: 3.67 ng/mL, CV%: 15.45%) and L15-033 (mean: 5.12 ng/mL, CV%: 5.12%)

### **Standard curve calculation per assay**

- Standard curves for Innostest assays ( $A\beta_{1-42}$ , t-tau and p-tau) were calculated with a 4-parameter logistic regression (provided by the manufacturer).

- Standard curves for sTREM2 assays were calculated by with a 4-parameter logistic regression in the MSD software.

- Standard curves for YKL-40 assays were calculated by a polinomic regression in Excel as recommended by the manufacturer.

- Standard curves for PGRN assays were calculated by a polinomic regression in Excel as recommended by the manufacturer.

All the assays had standard curves with a R squared over 0.95
